# Supplementary material for: One-dimensional coaxial cable-like MWCNTs/Sn4P3@C as an anode material with long-term durability for lithium ion batteries
Source: Royal Society of Chemistry journal article supplement (doi:10.1039/d0qi00373e), 2020-01-01
Supplement: d0qi00373e1.pdf [file d0qi00373e1.pdf]

## Supporting Information for

# One-dimension coaxial cable-like MWCNTs/Sn<sub>4</sub>P<sub>3</sub>@C as anode

## materials with long-term durability for lithium ion batteries

Shuting Sun <sup>a</sup>, Ruhong Li <sup>a</sup>, Wenhui Wang<sup>\*b1</sup>, Deying Mu <sup>a</sup>, Jianchao Liu <sup>a</sup>, Tianrui Chen <sup>a</sup>, Shuang Tian <sup>c</sup>, Weimin Zhu <sup>d</sup> and Changsong Dai<sup>\*a2</sup>

<sup>a</sup> MIIT Key Laboratory of Critical Materials Technology for New Energy Conversion and Storage, School of Chemistry and Chemical Engineering, Harbin Institute of Technology, Harbin, 150001, China

<sup>b</sup> School of Civil and Environmental Engineering, Harbin Institute of Technology, Shenzhen, 518055, China

<sup>c</sup> Ningbo Institute of Materials Technology & Engineering, CAS, Ningbo, 315000, China

<sup>d</sup> Wolong Electric Group Zhejiang Dengta Power Source Co., Ltd, Shaoxing, 312300, China

## Material Synthesis

**Synthesis of MWCNTs/Sn<sub>4</sub>P<sub>3</sub>:** Typically, 100 mg MWCNTs/SnO<sub>2</sub> was hand-milled with 1 g NaH<sub>2</sub>PO<sub>2</sub>, and then heated at 300 °C for 30 min with a heating rate of 5 °C min<sup>-1</sup> in Ar atmosphere. After the furnace was cooled down, the dark sample was obtained by washing the mixtures with water and HCl solution (0.1 M) for three times, respectively. Finally, the product was dried in a 60 °C vacuum oven for 12 h.

**Synthesis of Sn<sub>4</sub>P<sub>3</sub>:** In a typical procedure, amounts of Sn and red phosphorus with the molar ratio of 4:6 (Sn/P) were added into ethylenediamine solution and kept stirring for 3 h. Then the dispersion was transferred into a 50mL Teflon-lined autoclave and maintained at 200 °C for 40 h. Subsequently, the mixture was cooled down naturally. The samples were centrifuged with water and ethanol, respectively, followed by stirring in diluted HCl (0.1 mol L<sup>-1</sup>) for 24 h. Then the mixture was washed with water and ethanol for several times and dried under vacuum at 60 °C.

---

<sup>1</sup> b\*Corresponding author. Tel: +86-13670198451. E-mail: wangwenhui@hit.edu.cn

<sup>2</sup> a\*Corresponding author. Tel: +86-0451-86413721. E-mail: changsd@hit.edu.cn

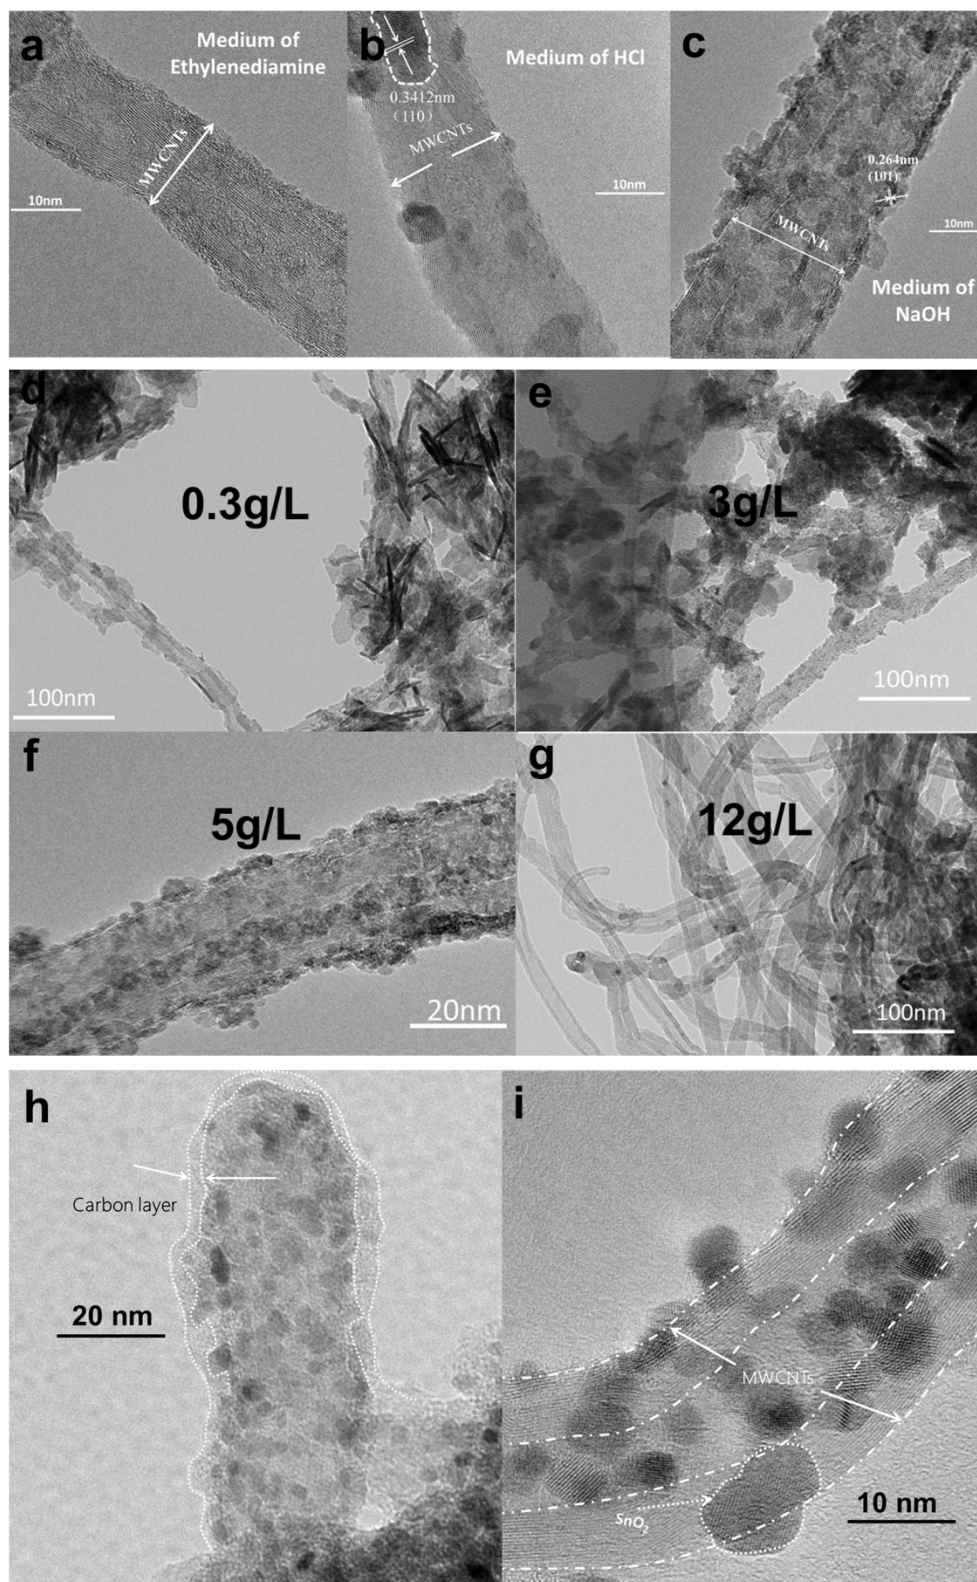

Figure S1. The influence of hydrothermal conditions on the synthesis of MWCNTs/SnO<sub>2</sub> composites. Effect of reaction media in hydrothermal reaction: (a) ethylenediamine, (b) HCl and (c) NaOH aqueous solution. Effect of MWCNTs concentration in hydrothermal reaction: (d) 0.3g L<sup>-1</sup>; (e) 3g L<sup>-1</sup>; (f) 5g L<sup>-1</sup> and (g) 12g L<sup>-1</sup> in the synthesis of MWCNTs/SnO<sub>2</sub> composites. Effect of calcination time on MWCNTs/SnO<sub>2</sub>@C composites: (h) 2h and (i) 3h.

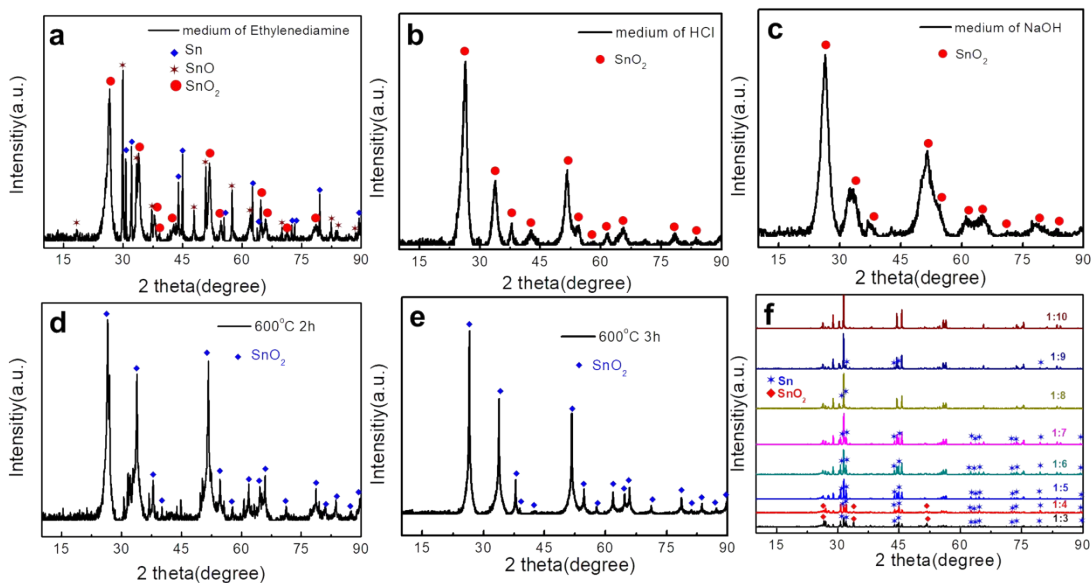

Figure S2. XRD patterns of MWCNTs/SnO<sub>2</sub> obtained under different synthetic conditions. Effect of reaction media in hydrothermal reaction: (a) ethylenediamine, (b) HCl and (c) NaOH aqueous solution. XRD patterns of MWCNTs/SnO<sub>2</sub>@C composites. Effect of different calcination time: (d) 2h and (e) 3h. (f) XRD patterns of the MWCNTs/Sn<sub>4</sub>P<sub>3</sub>@C composites with different quality ratio (MWCNTs/SnO<sub>2</sub>@C: NaH<sub>2</sub>PO<sub>2</sub>).

The synthesis procedures of MWCNTs/Sn<sub>4</sub>P<sub>3</sub>@C composites were described in detail in Figure S1-2, including the effect of medium, concentrations and calcination time on the required composition. Firstly, the medium of hydrothermal reaction was investigated, including ethylenediamine, HCl and NaOH. No SnO<sub>2</sub> nanoparticles is obviously observed on the surfaces of MWCNTs (Figure S1a) when ethylenediamine was used, while the corresponding XRD pattern (Figure S2a) exhibits diffraction peaks of SnO<sub>2</sub> phase. The result illustrates that Sn<sup>2+</sup> mainly occurs hydrolysis reaction in aqueous solution. Rare nanoparticles were found on MWCNTs surface when HCl aqueous solution was used, while dense nanoparticles were anchored on the MWCNTs backbone when NaOH aqueous solution was used due to the reaction between Sn<sup>2+</sup> ions and MWCNTs by means of electrostatic interaction (Figure S1b-c, S2b-c). The hydrolysis reaction is displayed as follows<sup>1</sup>:  $\text{Sn}^{2+} + 2\text{H}_2\text{O} \leftrightarrow [\text{Sn} \cdot (\text{H}_2\text{O})^2]^{2+} \leftrightarrow \text{Sn}(\text{OH})^+ + \text{H}_3\text{O}^+$ . According to the equation, Sn<sup>2+</sup> ions transformed into Sn(OH)<sup>+</sup> ions due to the depletion of H<sub>3</sub>O<sup>+</sup> ions in NaOH condition, and thus

easily attached to the surfaces of carboxyl-functionalized MWCNTs with negative charge<sup>2</sup>. Based on the above result, NaOH aqueous solution was chosen reaction medium for hydrothermal synthesis.

Subsequently, the effect of MWCNTs concentration on the as-synthesized MWCNTs/SnO<sub>2</sub> composites was investigated. The detailed architecture evolution of MWCNTs/SnO<sub>2</sub> composites are explicated in Figure S1d-g. It is showed that SnO<sub>2</sub> nanoparticles agglomerate at low concentration and rare SnO<sub>2</sub> nanoparticles dispersed at high concentration. Based on the above results, the MWCNTs/SnO<sub>2</sub> composites presented in the manuscript are obtained in the appropriate conditions, where the concentration of raw materials and MWCNTs were 5g L<sup>-1</sup> and the reaction medium was NaOH aqueous solution.

In this paragraph, the synthesis parameters of carbonization process were investigated. Polydopamine (PDA) was selected as carbon sources. Firstly, the MWCNTs/SnO<sub>2</sub> precursor was mixed in PDA solution under magnetic stirring for about 24 h to ensure the uniform coating of PDA on MWCNTs/SnO<sub>2</sub>. Secondly, the MWCNTs/SnO<sub>2</sub>@PDA was subjected to annealing at 600 °C under Ar atmosphere to obtain MWCNTs/SnO<sub>2</sub>@C. It is found that a uniform carbon layer had been decorated on the surface of MWCNTs/SnO<sub>2</sub> composites after being annealed for 2 h (Figure S1h, S2d), while the carbon layer disappeared when the annealing time was pro-long to 3 h (Figure S1i). Consequently, the best calcination time to obtain the carbon layer is 2 h.

Finally, the SnO<sub>2</sub> nanoparticles were chemically transformed into Sn<sub>4</sub>P<sub>3</sub> nanoparticles by reacting with NaH<sub>2</sub>PO<sub>2</sub>. The mass ratio of MWCNTs/SnO<sub>2</sub>@C and NaH<sub>2</sub>PO<sub>2</sub> is of critical importance in the process as shown in Figure S2f. The SnO<sub>2</sub> nanoparticles are completely transformed into Sn<sub>4</sub>P<sub>3</sub> nanoparticles when the mass

ratio of MWCNTs/SnO<sub>2</sub>@C composites with NaH<sub>2</sub>PO<sub>2</sub> reaches to 1:10.

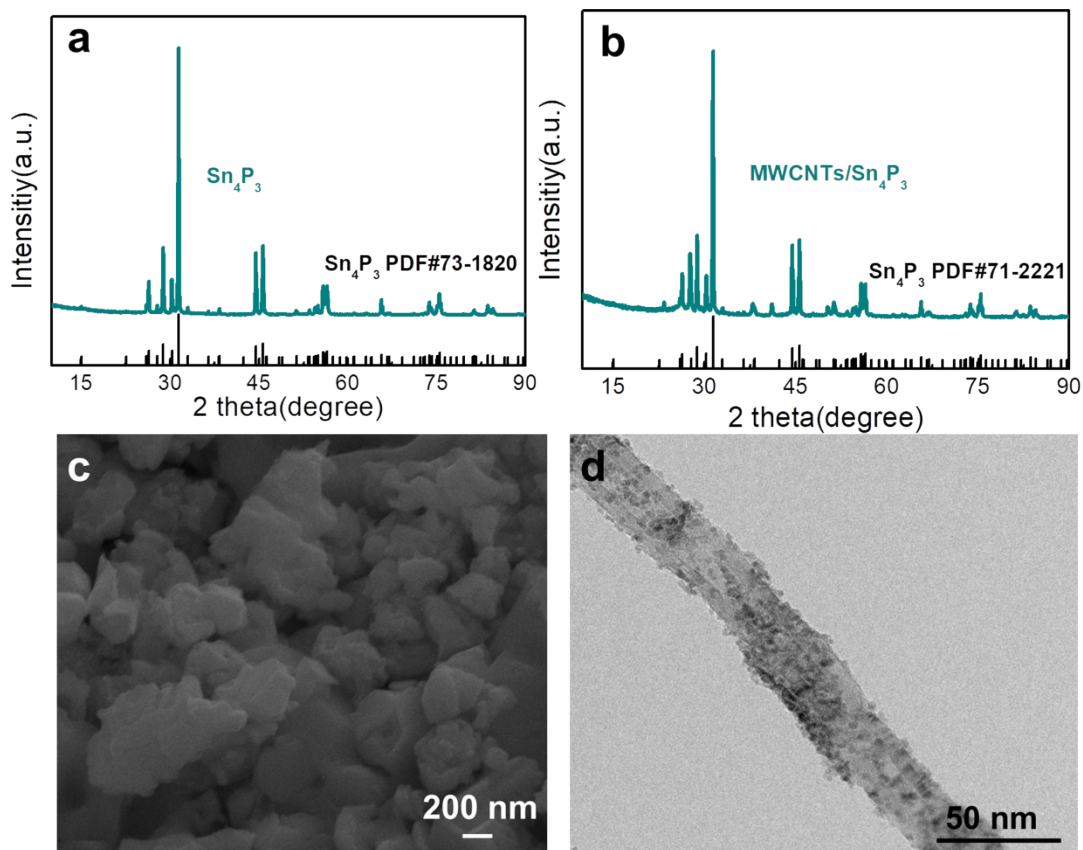

Figure S3. XRD patterns of the (a) bare Sn<sub>4</sub>P<sub>3</sub> and (b) MWCNTs/Sn<sub>4</sub>P<sub>3</sub>. (c) SEM image of the bare Sn<sub>4</sub>P<sub>3</sub>. (d) TEM image of the MWCNTs/Sn<sub>4</sub>P<sub>3</sub>.

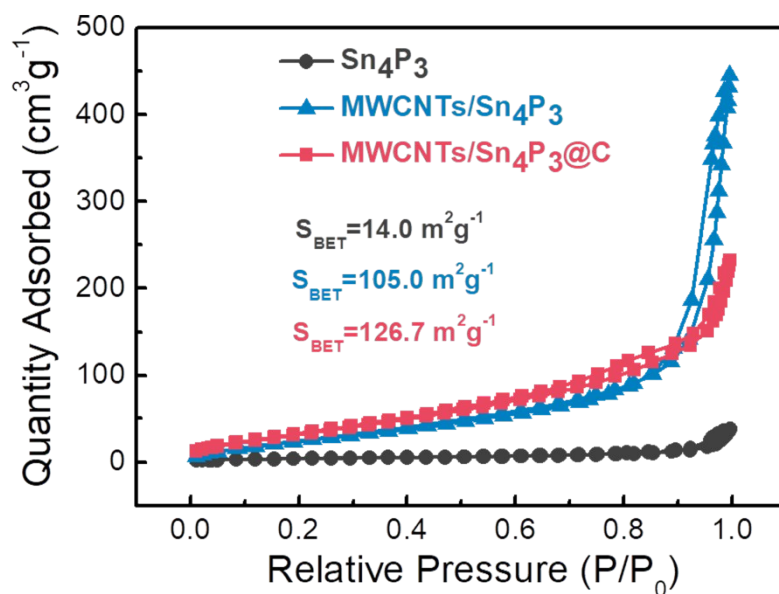

Figure S4. N<sub>2</sub> adsorption-desorption spectra of Sn<sub>4</sub>P<sub>3</sub>, MWCNTs/Sn<sub>4</sub>P<sub>3</sub> and MWCNTs/Sn<sub>4</sub>P<sub>3</sub>@C.

Table S1 Carbon content of MWCNTs/SnO<sub>2</sub> and MWCNTs/Sn<sub>4</sub>P<sub>3</sub>@C.

| Material                                 | Carbon content(wt%) |
|------------------------------------------|---------------------|
| MWCNTs/Sn <sub>4</sub> P <sub>3</sub>    | 26.04               |
| MWCNTs/Sn <sub>4</sub> P <sub>3</sub> @C | 32.51               |

Table S2 Electrical conductivity of Sn<sub>4</sub>P<sub>3</sub> and MWCNTs/Sn<sub>4</sub>P<sub>3</sub>@C

| Material                                 | Electrical conductivity (S m <sup>-1</sup> ) |                       |                       |
|------------------------------------------|----------------------------------------------|-----------------------|-----------------------|
| Sn <sub>4</sub> P <sub>3</sub>           | 1.72×10 <sup>-4</sup>                        | 1.76×10 <sup>-4</sup> | 1.76×10 <sup>-4</sup> |
| MWCNTs/Sn <sub>4</sub> P <sub>3</sub>    | 7.72×10 <sup>-3</sup>                        | 7.19×10 <sup>-3</sup> | 7.38×10 <sup>-3</sup> |
| MWCNTs/Sn <sub>4</sub> P <sub>3</sub> @C | 7.52×10 <sup>-2</sup>                        | 8.06×10 <sup>-2</sup> | 8.20×10 <sup>-2</sup> |

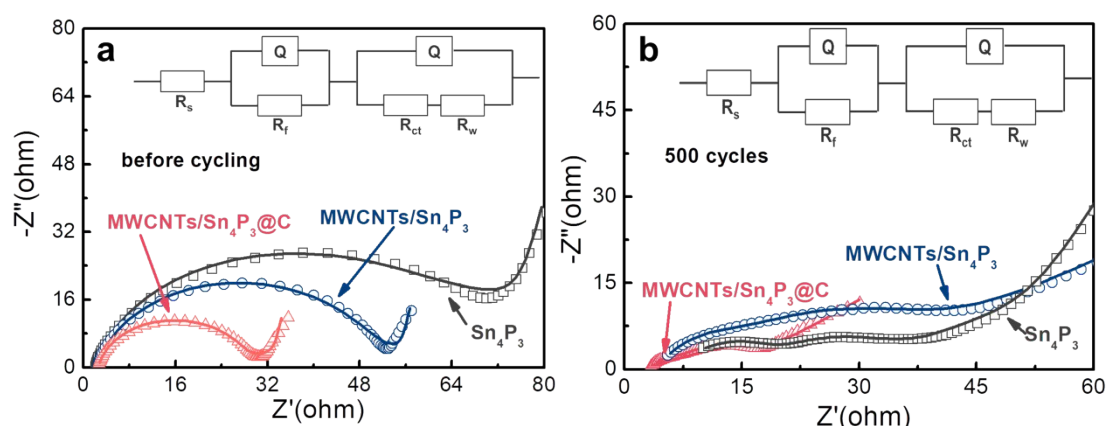Figure S5. The Nyquist plots of bare Sn<sub>4</sub>P<sub>3</sub>, MWCNTs/Sn<sub>4</sub>P<sub>3</sub> and the MWCNTs/Sn<sub>4</sub>P<sub>3</sub>@C electrodes. (a) before cycling; (b) after cycling 500 times at 500 mA g<sup>-1</sup> (inset shows the equivalent circuit diagram).

The components for  $R_s$ ,  $R_f$  and  $R_{ct}$  in the equivalent circuit diagram for the MWCNTs/Sn<sub>4</sub>P<sub>3</sub>@C electrode represent the electrolyte resistance, the SEI film resistance and charge-transfer resistance, respectively. Moreover, the inclined line in the low frequency region of the plots is relevant to the Warburg impedance ( $R_w$ ), which represents the diffusion coefficient of Li<sup>+</sup> at the interface between the electrode and the electrolyte<sup>3</sup>. Based on a fitted equivalent circuit, the charge transfer resistances were obtained after 500 cycles at the full de-lithiated state.

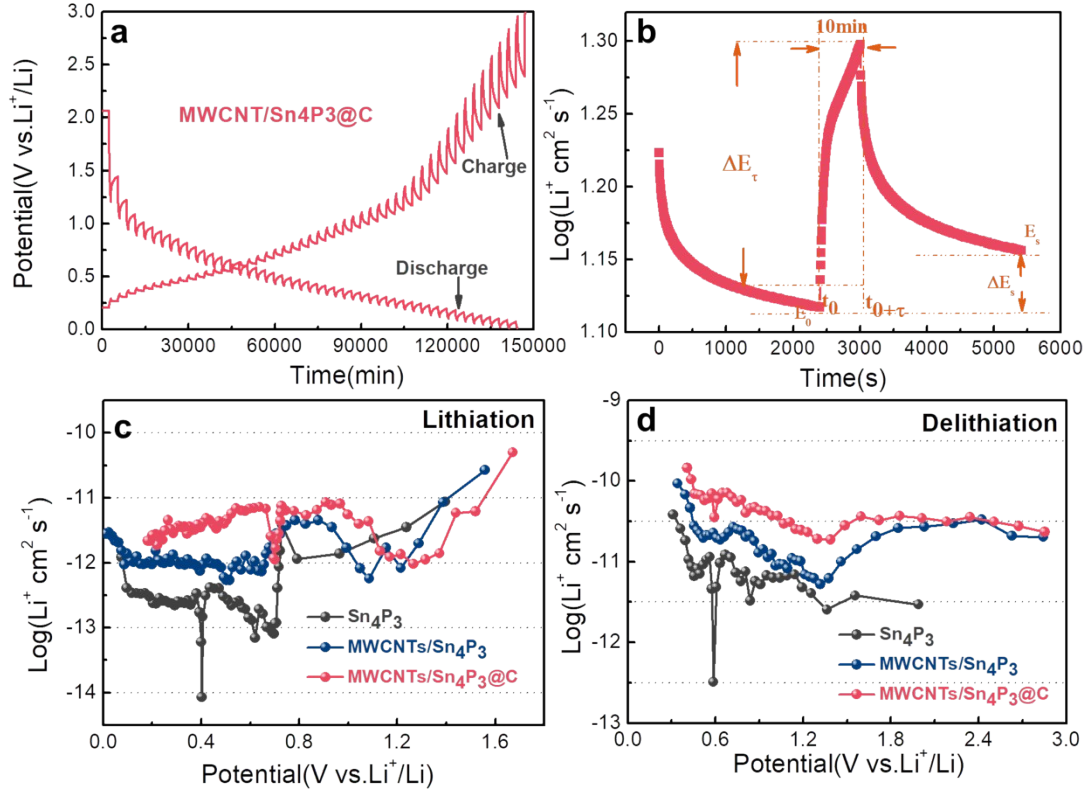

Figure S6. (a) The GITT curve of MWCNTs/Sn<sub>4</sub>P<sub>3</sub>@C during the charge/discharge process in 0.01-3.0 V. (b) The voltage profile for a single titration. The calculated Li<sup>+</sup> diffusion coefficients ( $D_{Li^+}$ ) from GITT curves for Sn<sub>4</sub>P<sub>3</sub>, MWCNTs/Sn<sub>4</sub>P<sub>3</sub> and MWCNTs/Sn<sub>4</sub>P<sub>3</sub>@C as a function of cell voltage during (c) the lithiation process and (d) the de-lithiation process.

The diffusion coefficients can be further quantified according to the following equation (Eq. (1))<sup>4</sup>:

$$D_{Li^+} = \frac{4}{\pi\tau} \left( \frac{m_B V_M}{M_B A} \right)^2 \left( \frac{\Delta E_S}{\Delta E_\tau} \right)^2 \quad (1)$$

where  $V_M$  and  $m_B$  represent the molar volume of the compound and the mass of active material, respectively. The data of Sn<sub>4</sub>P<sub>3</sub> were used in our calculation. In addition,  $M_B$  is relevant to the molecular weight and  $A$  indicates the total contact area between the electrolyte and the electrode. Generally, either the geometric electrode or the BET surface is used as an approximation of  $A$ <sup>5</sup>, and the geometric surface area of the electrode was used in this paper.  $\Delta E_S$  represents the voltage difference of each intermittent step, and  $\Delta E_\tau$  is related with the change in the overall voltage under constant current conditions.



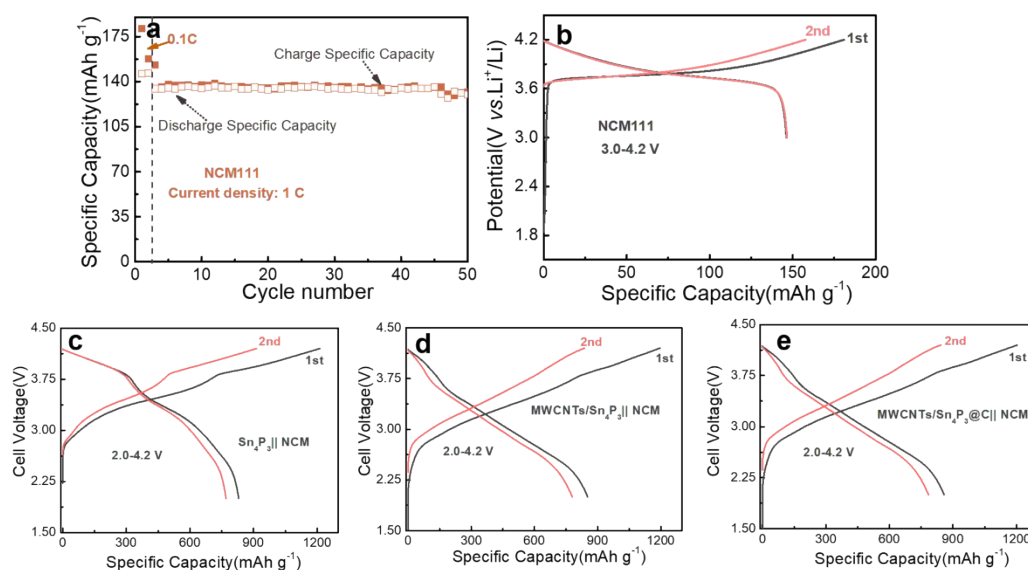

Figure S7. (a) The cycling performance curve of NCM111 half-cell at 3.0-4.3 V. Voltage profiles of the (b) NCM111 half cell at the current density of 0.1 C, (c)  $\text{Sn}_4\text{P}_3||\text{NCM}$ , (d)  $\text{MWCNTs}/\text{Sn}_4\text{P}_3||\text{NCM}$  and (e)  $\text{MWCNTs}/\text{Sn}_4\text{P}_3@C||\text{NCM}$  full cell at the current density of 200  $\text{mA g}^{-1}$ .

## References

1. H. Cox and A. J. Stace, Stace, Molecular View of the Anomalous Acidities of  $\text{Sn}^{2+}$ ,  $\text{Pb}^{2+}$ , and  $\text{Hg}^{2+}$ . *J. Am. Chem. Soc.*, 2004, **126**, 3939-3947.
2. A. K. Jain, V. Dubey, N. K. Mehra, N. Lodhi, M. Nahar, D. K. Mishra and N. K. Jain, Carbohydrate-conjugated multiwalled carbon nanotubes: development and characterization. *Nanomedicine: Nanotechnology, Biology and Medicine*, 2009, **5**, 432-442.
3. Y. Von Lim, S. Huang, Y. Zhang, D. Kong, Y. Wang, L. Guo, J. Zhang, Y. Shi, T. P. Chen, L. K. Ang and H. Y. Yang, Bifunctional porous iron phosphide/carbon nanostructure enabled high-performance sodium-ion battery and hydrogen evolution reaction. *Energy Storage Materials*, 2018, **15**, 98-107.
4. J. W. Dibden, N. Meddings, J. R. Owen and N. Garcia Araez, Quantitative Galvanostatic Intermittent Titration Technique for the Analysis of a Model System with Applications in Lithium-Sulfur Batteries. *Chem. electrochem.*, 2018, **5**, 445-454.
5. H. Huang, T. Faulkner, J. Barker and M. Y. Saidi, Lithium metal phosphates, power and automotive applications. *J. Power Sources*, 2009, **189**, 748-751.
